# Supplementary material
Source: PubMed Central journal article supplement (PMC3680368)
Supplement: NIHMS466225-supplement-Supplementary_Table_1.pdf [file NIHMS466225-supplement-Supplementary_Table_1.pdf]

**Supplementary Table 1: SNP association with psoriasis**

| SNP ID     | Chr | B36 Region (bp) | Gene Symbol | Allele | Allele | Case Count |     |     |       | Control Count |     |     |       | Allelic Test* |          |      |      |      |
|------------|-----|-----------------|-------------|--------|--------|------------|-----|-----|-------|---------------|-----|-----|-------|---------------|----------|------|------|------|
|            |     |                 |             |        |        | Samples    | 1   | 2   | 11    | 12            | 22  | Sum | 11    | 12            | 22       | Sum  | P    | OR   |
| rs35667974 | 2   | 162,832,883     | IFIH1       | ALL    | C      | T          | 3   | 37  | 2,058 | 2,098         | 2   | 72  | 1,674 | 1,748         | 4.09E-05 | 0.45 | 0.31 | 0.67 |
|            |     |                 |             | SS1    | C      | T          | 0   | 6   | 457   | 463           | 0   | 23  | 435   | 458           | 1.32E-03 | 0.25 | 0.10 | 0.62 |
|            |     |                 |             | SS2    | C      | T          | 0   | 11  | 482   | 493           | 1   | 20  | 474   | 495           | 5.49E-02 | 0.50 | 0.24 | 1.03 |
|            |     |                 |             | SS3    | C      | T          | 0   | 7   | 473   | 480           | 1   | 15  | 410   | 426           | 1.86E-02 | 0.36 | 0.15 | 0.87 |
| rs28725418 | 17  | 69,817,886      | DNAI2       | ALL    | A      | G          | 3   | 112 | 1,323 | 1,438         | 4   | 166 | 1,209 | 1,379         | 1.44E-04 | 0.63 | 0.50 | 0.80 |
|            |     |                 |             | SS1    | A      | G          | 1   | 27  | 435   | 463           | 2   | 54  | 402   | 458           | 1.21E-03 | 0.48 | 0.30 | 0.75 |
|            |     |                 |             | SS2    | A      | G          | 0   | 37  | 456   | 493           | 1   | 54  | 440   | 495           | 4.57E-02 | 0.65 | 0.43 | 0.99 |
|            |     |                 |             | SS3    | A      | G          | 2   | 48  | 432   | 482           | 1   | 58  | 367   | 426           | 1.45E-01 | 0.75 | 0.51 | 1.10 |
| rs61746943 | 14  | 44,727,774      | FANCM       | ALL    | T      | C          | 1   | 81  | 1,351 | 1,433         | 0   | 40  | 1,339 | 1,379         | 1.51E-04 | 2.05 | 1.40 | 3.00 |
|            |     |                 |             | SS1    | T      | C          | 0   | 40  | 420   | 460           | 0   | 15  | 443   | 458           | 6.59E-04 | 2.73 | 1.50 | 4.98 |
|            |     |                 |             | SS2    | T      | C          | 1   | 27  | 463   | 491           | 0   | 14  | 481   | 495           | 1.93E-02 | 2.12 | 1.11 | 4.04 |
|            |     |                 |             | SS3    | T      | C          | 0   | 14  | 468   | 482           | 0   | 11  | 415   | 426           | 7.68E-01 | 1.13 | 0.51 | 2.50 |
| rs10804166 | 2   | 208,744,957     | LOC389073   | ALL    | T      | C          | 13  | 238 | 1,186 | 1,437         | 13  | 153 | 1,208 | 1,374         | 2.16E-04 | 1.45 | 1.19 | 1.76 |
|            |     |                 |             | SS1    | T      | C          | 5   | 83  | 374   | 462           | 1   | 47  | 409   | 457           | 1.59E-04 | 1.98 | 1.38 | 2.83 |
|            |     |                 |             | SS2    | T      | C          | 5   | 79  | 409   | 493           | 3   | 57  | 433   | 493           | 2.82E-02 | 1.45 | 1.04 | 2.03 |
|            |     |                 |             | SS3    | T      | C          | 3   | 76  | 403   | 482           | 9   | 49  | 366   | 424           | 6.40E-01 | 1.08 | 0.77 | 1.52 |
| rs10888748 | 1   | 52,400,877      | ZFYVE9      | ALL    | A      | G          | 20  | 312 | 1,103 | 1,435         | 12  | 230 | 1,125 | 1,367         | 3.50E-04 | 1.36 | 1.15 | 1.62 |
|            |     |                 |             | SS1    | A      | G          | 4   | 96  | 362   | 462           | 3   | 66  | 387   | 456           | 1.45E-02 | 1.48 | 1.08 | 2.03 |
|            |     |                 |             | SS2    | A      | G          | 8   | 114 | 371   | 493           | 4   | 92  | 399   | 495           | 3.26E-02 | 1.35 | 1.02 | 1.78 |
|            |     |                 |             | SS3    | A      | G          | 8   | 102 | 370   | 480           | 5   | 72  | 339   | 416           | 1.02E-01 | 1.28 | 0.95 | 1.73 |
| rs10930046 | 2   | 162,846,229     | IFIH1       | ALL    | C      | T          | 3   | 39  | 2,056 | 2,098         | 4   | 65  | 1,675 | 1,744         | 5.70E-04 | 0.52 | 0.36 | 0.76 |
|            |     |                 |             | SS1    | C      | T          | 0   | 7   | 454   | 461           | 2   | 23  | 432   | 457           | 4.87E-04 | 0.25 | 0.11 | 0.58 |
|            |     |                 |             | SS2    | C      | T          | 0   | 12  | 481   | 493           | 1   | 20  | 474   | 495           | 8.58E-02 | 0.54 | 0.27 | 1.10 |
|            |     |                 |             | SS3    | C      | T          | 2   | 11  | 466   | 479           | 0   | 10  | 416   | 426           | 4.76E-01 | 1.34 | 0.60 | 3.00 |
| rs10152105 | 14  | 35,304,962      | GARNL1      | ALL    | T      | C          | 26  | 371 | 1,034 | 1,431         | 18  | 285 | 1,071 | 1,374         | 5.94E-04 | 1.31 | 1.12 | 1.53 |
|            |     |                 |             | SS1    | T      | C          | 11  | 106 | 341   | 458           | 7   | 81  | 366   | 454           | 2.21E-02 | 1.39 | 1.05 | 1.84 |
|            |     |                 |             | SS2    | T      | C          | 7   | 142 | 344   | 493           | 5   | 118 | 371   | 494           | 6.97E-02 | 1.26 | 0.98 | 1.63 |
|            |     |                 |             | SS3    | T      | C          | 8   | 123 | 349   | 480           | 6   | 86  | 334   | 426           | 6.07E-02 | 1.30 | 0.99 | 1.72 |
| rs2273137  | 20  | 2,583,212       | NOL5A       | ALL    | G      | A          | 3   | 120 | 833   | 956           | 5   | 173 | 775   | 953           | 6.37E-04 | 0.66 | 0.52 | 0.84 |
|            |     |                 |             | SS1    | G      | A          | 1   | 54  | 408   | 463           | 5   | 93  | 360   | 458           | 7.15E-05 | 0.51 | 0.36 | 0.71 |
|            |     |                 |             | SS2    | G      | A          | 2   | 66  | 425   | 493           | 0   | 80  | 415   | 495           | 4.10E-01 | 0.87 | 0.62 | 1.21 |
| rs11085959 | 19  | 15,502,030      | CYP4F22     | ALL    | C      | T          | 294 | 764 | 379   | 1,437         | 264 | 651 | 464   | 1,379         | 1.08E-03 | 1.19 | 1.07 | 1.32 |
|            |     |                 |             | SS1    | C      | T          | 103 | 254 | 106   | 463           | 94  | 218 | 146   | 458           | 2.14E-02 | 1.24 | 1.03 | 1.49 |
|            |     |                 |             | SS2    | C      | T          | 95  | 268 | 129   | 492           | 96  | 221 | 178   | 495           | 3.08E-02 | 1.22 | 1.02 | 1.45 |
|            |     |                 |             | SS3    | C      | T          | 96  | 242 | 144   | 482           | 74  | 212 | 140   | 426           | 2.35E-01 | 1.12 | 0.93 | 1.35 |
| rs5050     | 1   | 228,916,509     | AGT         | ALL    | G      | T          | 27  | 361 | 1,045 | 1,433         | 48  | 391 | 940   | 1,379         | 1.18E-03 | 0.79 | 0.69 | 0.91 |
|            |     |                 |             | SS1    | G      | T          | 6   | 129 | 328   | 463           | 18  | 120 | 320   | 458           | 2.93E-01 | 0.88 | 0.68 | 1.12 |
|            |     |                 |             | SS2    | G      | T          | 11  | 119 | 359   | 489           | 22  | 131 | 342   | 495           | 4.89E-02 | 0.78 | 0.62 | 1.00 |
|            |     |                 |             | SS3    | G      | T          | 10  | 113 | 358   | 481           | 8   | 140 | 278   | 426           | 9.20E-03 | 0.72 | 0.56 | 0.92 |
| rs62617118 | 7   | 149,059,745     |             | ALL    | A      | G          | 0   | 41  | 914   | 955           | 2   | 71  | 878   | 951           | 1.22E-03 | 0.53 | 0.36 | 0.79 |
|            |     |                 |             | SS1    | A      | G          | 0   | 26  | 437   | 463           | 0   | 37  | 421   | 458           | 1.46E-01 | 0.69 | 0.41 | 1.14 |
|            |     |                 |             | SS2    | A      | G          | 0   | 15  | 477   | 492           | 2   | 34  | 457   | 493           | 1.40E-03 | 0.39 | 0.21 | 0.71 |
| rs9176     | 5   | 73,968,071      | ENC1        | ALL    | T      | C          | 181 | 670 | 583   | 1,434         | 136 | 607 | 633   | 1,376         | 1.29E-03 | 1.20 | 1.07 | 1.34 |
|            |     |                 |             | SS1    | T      | C          | 58  | 226 | 177   | 461           | 45  | 211 | 202   | 458           | 5.71E-02 | 1.20 | 0.99 | 1.46 |
|            |     |                 |             | SS2    | T      | C          | 66  | 225 | 201   | 492           | 51  | 205 | 238   | 494           | 1.44E-02 | 1.26 | 1.05 | 1.52 |
|            |     |                 |             | SS3    | T      | C          | 57  | 219 | 205   | 481           | 40  | 191 | 193   | 424           | 2.31E-01 | 1.13 | 0.93 | 1.37 |
| rs4065     | 10  | 75,346,470      | C10orf55    | ALL    | C      | T          | 215 | 671 | 532   | 1,418         | 260 | 656 | 450   | 1,366         | 1.33E-03 | 0.84 | 0.75 | 0.93 |
|            |     |                 |             | SS1    | C      | T          | 70  | 221 | 172   | 463           | 92  | 225 | 140   | 457           | 1.22E-02 | 0.79 | 0.66 | 0.95 |
|            |     |                 |             | SS2    | C      | T          | 70  | 224 | 197   | 491           | 100 | 222 | 170   | 492           | 8.45E-03 | 0.78 | 0.65 | 0.94 |
|            |     |                 |             | SS3    | C      | T          | 75  | 226 | 163   | 464           | 68  | 209 | 140   | 417           | 7.17E-01 | 0.97 | 0.80 | 1.17 |
| rs2269715  | 1   | 156,491,643     | CD1A        | ALL    | G      | C          | 1   | 69  | 395   | 465           | 1   | 36  | 421   | 458           | 1.49E-03 | 1.91 | 1.27 | 2.86 |
|            |     |                 |             | SS1    | G      | C          | 1   | 69  | 395   | 465           | 1   | 36  | 421   | 458           | 1.49E-03 | 1.91 | 1.27 | 2.86 |





|             |    |             |         |     |   |   |     |     |     |       |     |     |     |       |          |      |      |      |
|-------------|----|-------------|---------|-----|---|---|-----|-----|-----|-------|-----|-----|-----|-------|----------|------|------|------|
| rs62620995  | 8  | 105,436,440 | DPYS    | ALL | T | C | 0   | 19  | 937 | 956   | 1   | 36  | 916 | 953   | 1.08E-02 | 0.49 | 0.28 | 0.86 |
|             |    |             |         | SS1 | T | C | 0   | 9   | 454 | 463   | 1   | 18  | 439 | 458   | 3.68E-02 | 0.44 | 0.20 | 0.97 |
|             |    |             |         | SS2 | T | C | 0   | 10  | 483 | 493   | 0   | 18  | 477 | 495   | 1.31E-01 | 0.55 | 0.25 | 1.20 |
| rs3006453   | 1  | 151,584,347 | PGLYRP4 | ALL | C | T | 3   | 117 | 834 | 954   | 2   | 83  | 867 | 952   | 1.11E-02 | 1.44 | 1.09 | 1.91 |
|             |    |             |         | SS1 | C | T | 1   | 59  | 401 | 461   | 1   | 35  | 421 | 457   | 1.44E-02 | 1.68 | 1.10 | 2.55 |
|             |    |             |         | SS2 | C | T | 2   | 58  | 433 | 493   | 1   | 48  | 446 | 495   | 2.34E-01 | 1.26 | 0.86 | 1.85 |
| rs13084057  | 3  | 46,159,729  | CCR3    | ALL | G | C | 5   | 122 | 829 | 956   | 4   | 166 | 782 | 952   | 1.11E-02 | 0.74 | 0.58 | 0.93 |
|             |    |             |         | SS1 | G | C | 3   | 57  | 403 | 463   | 2   | 75  | 381 | 458   | 1.43E-01 | 0.77 | 0.55 | 1.09 |
|             |    |             |         | SS2 | G | C | 2   | 65  | 426 | 493   | 2   | 91  | 401 | 494   | 3.51E-02 | 0.71 | 0.51 | 0.98 |
| rs1801046   | 12 | 7,133,440   | C1R     | ALL | A | G | 64  | 366 | 526 | 956   | 42  | 340 | 567 | 949   | 1.17E-02 | 1.21 | 1.04 | 1.41 |
|             |    |             |         | SS1 | A | G | 37  | 178 | 248 | 463   | 13  | 168 | 274 | 455   | 3.23E-03 | 1.38 | 1.11 | 1.71 |
|             |    |             |         | SS2 | A | G | 27  | 188 | 278 | 493   | 29  | 172 | 293 | 494   | 5.10E-01 | 1.07 | 0.87 | 1.32 |
| rs2291533   | 3  | 63,792,470  | C3orf49 | ALL | C | G | 28  | 290 | 636 | 954   | 40  | 326 | 585 | 951   | 1.26E-02 | 0.82 | 0.70 | 0.96 |
|             |    |             |         | SS1 | C | G | 14  | 142 | 305 | 461   | 24  | 159 | 273 | 456   | 2.40E-02 | 0.77 | 0.61 | 0.97 |
|             |    |             |         | SS2 | C | G | 14  | 148 | 331 | 493   | 16  | 167 | 312 | 495   | 2.02E-01 | 0.86 | 0.69 | 1.08 |
| rs3204850   | 3  | 46,425,301  | CCRL2   | ALL | G | A | 7   | 141 | 807 | 955   | 8   | 183 | 760 | 951   | 1.27E-02 | 0.76 | 0.61 | 0.94 |
|             |    |             |         | SS1 | G | A | 4   | 60  | 399 | 463   | 3   | 79  | 376 | 458   | 1.32E-01 | 0.77 | 0.56 | 1.08 |
|             |    |             |         | SS2 | G | A | 3   | 81  | 408 | 492   | 5   | 104 | 384 | 493   | 4.61E-02 | 0.74 | 0.55 | 1.00 |
| rs937838    | 3  | 44,918,108  | TGM4    | ALL | C | G | 5   | 139 | 811 | 955   | 11  | 170 | 771 | 952   | 1.38E-02 | 0.76 | 0.60 | 0.94 |
|             |    |             |         | SS1 | C | G | 2   | 55  | 406 | 463   | 5   | 80  | 372 | 457   | 6.29E-03 | 0.62 | 0.44 | 0.88 |
|             |    |             |         | SS2 | C | G | 3   | 84  | 405 | 492   | 6   | 90  | 399 | 495   | 3.86E-01 | 0.88 | 0.65 | 1.18 |
| rs1844463   | 22 | 32,971,743  |         | ALL | C | T | 26  | 255 | 671 | 952   | 36  | 292 | 622 | 950   | 1.42E-02 | 0.81 | 0.69 | 0.96 |
|             |    |             |         | SS1 | C | T | 14  | 123 | 324 | 461   | 15  | 140 | 302 | 457   | 2.10E-01 | 0.86 | 0.67 | 1.09 |
|             |    |             |         | SS2 | C | T | 12  | 132 | 347 | 491   | 21  | 152 | 320 | 493   | 2.79E-02 | 0.77 | 0.61 | 0.97 |
| rs1135889   | 17 | 71,437,716  | FBF1    | ALL | A | C | 47  | 368 | 542 | 957   | 36  | 326 | 593 | 955   | 1.45E-02 | 1.21 | 1.04 | 1.41 |
|             |    |             |         | SS1 | A | C | 26  | 176 | 262 | 464   | 12  | 163 | 285 | 460   | 2.89E-02 | 1.28 | 1.03 | 1.59 |
|             |    |             |         | SS2 | A | C | 21  | 192 | 280 | 493   | 24  | 163 | 308 | 495   | 1.98E-01 | 1.15 | 0.93 | 1.42 |
| rs4848669   | 2  | 121,436,862 | GLI2    | ALL | T | C | 3   | 113 | 837 | 953   | 2   | 81  | 868 | 951   | 1.49E-02 | 1.42 | 1.07 | 1.90 |
|             |    |             |         | SS1 | T | C | 1   | 52  | 409 | 462   | 1   | 38  | 418 | 457   | 1.53E-01 | 1.36 | 0.89 | 2.06 |
|             |    |             |         | SS2 | T | C | 2   | 61  | 428 | 491   | 1   | 43  | 450 | 494   | 4.60E-02 | 1.49 | 1.00 | 2.20 |
| rs34284214  | 10 | 74,551,957  | ECD     | ALL | A | G | 4   | 111 | 839 | 954   | 4   | 77  | 870 | 951   | 1.54E-02 | 1.42 | 1.07 | 1.89 |
|             |    |             |         | SS1 | A | G | 2   | 53  | 407 | 462   | 1   | 40  | 416 | 457   | 1.35E-01 | 1.37 | 0.91 | 2.06 |
|             |    |             |         | SS2 | A | G | 2   | 58  | 432 | 492   | 3   | 37  | 454 | 494   | 5.40E-02 | 1.48 | 0.99 | 2.20 |
| rs1539567   | 9  | 129,281,987 | LRSAM1  | ALL | A | G | 55  | 328 | 572 | 955   | 44  | 288 | 620 | 952   | 1.59E-02 | 1.21 | 1.04 | 1.41 |
|             |    |             |         | SS1 | A | G | 29  | 148 | 286 | 463   | 15  | 126 | 317 | 458   | 4.85E-03 | 1.39 | 1.11 | 1.76 |
|             |    |             |         | SS2 | A | G | 26  | 180 | 286 | 492   | 29  | 162 | 303 | 494   | 4.89E-01 | 1.08 | 0.87 | 1.33 |
| hDV70663683 | 5  | 158,692,781 |         | ALL | C | T | 306 | 726 | 408 | 1,440 | 354 | 664 | 363 | 1,381 | 1.70E-02 | 0.88 | 0.79 | 0.98 |
|             |    |             |         | SS1 | C | T | 102 | 220 | 143 | 465   | 118 | 225 | 117 | 460   | 5.18E-02 | 0.83 | 0.70 | 1.00 |
|             |    |             |         | SS2 | C | T | 99  | 264 | 130 | 493   | 135 | 239 | 121 | 495   | 4.27E-02 | 0.83 | 0.70 | 0.99 |
| rs6165      | 2  | 49,044,545  | FSHR    | ALL | C | T | 206 | 491 | 258 | 955   | 181 | 465 | 306 | 952   | 1.71E-02 | 1.17 | 1.03 | 1.33 |
|             |    |             |         | SS1 | C | T | 104 | 246 | 113 | 463   | 71  | 234 | 153 | 458   | 5.78E-04 | 1.38 | 1.15 | 1.66 |
|             |    |             |         | SS2 | C | T | 102 | 245 | 145 | 492   | 110 | 231 | 153 | 494   | 9.61E-01 | 1.00 | 0.84 | 1.19 |
| rs35903413  | 1  | 17,541,150  | PADI4   | ALL | A | G | 16  | 222 | 717 | 955   | 28  | 249 | 675 | 952   | 1.73E-02 | 0.80 | 0.67 | 0.96 |
|             |    |             |         | SS1 | A | G | 7   | 106 | 350 | 463   | 18  | 127 | 313 | 458   | 4.01E-03 | 0.69 | 0.53 | 0.89 |
|             |    |             |         | SS2 | A | G | 9   | 116 | 367 | 492   | 10  | 122 | 362 | 494   | 6.29E-01 | 0.94 | 0.73 | 1.21 |
| rs1059840   | 19 | 10,231,490  | MRPL4   | ALL | A | T | 18  | 214 | 722 | 954   | 26  | 249 | 677 | 952   | 1.75E-02 | 0.80 | 0.67 | 0.96 |
|             |    |             |         | SS1 | A | T | 9   | 97  | 355 | 461   | 15  | 121 | 321 | 457   | 1.37E-02 | 0.72 | 0.55 | 0.94 |
|             |    |             |         | SS2 | A | T | 9   | 117 | 367 | 493   | 11  | 128 | 356 | 495   | 3.56E-01 | 0.89 | 0.69 | 1.14 |
| rs41293076  | 20 | 33,611,736  |         | ALL | G | T | 4   | 112 | 838 | 954   | 11  | 136 | 806 | 953   | 1.76E-02 | 0.74 | 0.58 | 0.95 |
|             |    |             |         | SS1 | G | T | 1   | 52  | 408 | 461   | 5   | 63  | 390 | 458   | 7.42E-02 | 0.72 | 0.50 | 1.03 |
|             |    |             |         | SS2 | G | T | 3   | 60  | 430 | 493   | 6   | 73  | 416 | 495   | 1.13E-01 | 0.76 | 0.55 | 1.07 |
| rs16995309  | 20 | 48,631,280  | PTPN1   | ALL | T | C | 0   | 11  | 947 | 958   | 0   | 25  | 928 | 953   | 1.81E-02 | 0.43 | 0.21 | 0.88 |
|             |    |             |         | SS1 | T | C | 0   | 7   | 458 | 465   | 0   | 14  | 446 | 460   | 1.18E-01 | 0.49 | 0.20 | 1.22 |
|             |    |             |         | SS2 | T | C | 0   | 4   | 489 | 493   | 0   | 11  | 482 | 493   | 6.96E-02 | 0.36 | 0.11 | 1.14 |
| rs1860961   | 12 | 5,711,994   | TMEM16B | ALL | C | A | 9   | 162 | 785 | 956   | 5   | 129 | 818 | 952   | 1.85E-02 | 1.32 | 1.05 | 1.66 |
|             |    |             |         | SS1 | C | A | 5   | 81  | 377 | 463   | 2   | 63  | 392 | 457   | 5.60E-02 | 1.38 | 0.99 | 1.92 |
|             |    |             |         | SS2 | C | A | 4   | 81  | 408 | 493   | 3   | 66  | 426 | 495   | 1.54E-01 | 1.27 | 0.91 | 1.75 |
| rs2470911   | 15 | 42,834,426  | TRIM69  | ALL | G | A | 74  | 360 | 521 | 955   | 80  | 410 | 460 | 950   | 1.92E-02 | 0.84 | 0.73 | 0.97 |
|             |    |             |         | SS1 | G | A | 41  | 179 | 242 | 462   | 45  | 202 | 209 | 456   | 7.83E-02 | 0.84 | 0.68 | 1.02 |
|             |    |             |         | SS2 | G | A | 33  | 181 | 279 | 493   | 35  | 208 | 251 | 494   | 1.21E-01 | 0.85 | 0.70 | 1.04 |
| rs930571    | 17 | 74,010,287  | DNAHL1  | ALL | C | T | 45  | 294 | 618 | 957   | 31  | 264 | 657 | 952   | 1.93E-02 | 1.22 | 1.03 | 1.43 |
|             |    |             |         | SS1 | C | T | 22  | 145 | 298 | 465   | 15  | 114 | 329 | 458   | 1.01E-02 | 1.37 | 1.08 | 1.74 |
|             |    |             |         | SS2 | C | T | 23  | 149 | 320 | 492   | 16  | 150 | 328 | 494   | 4.31E-01 | 1.09 | 0.87 | 1.37 |
| rs3792234   | 2  | 48,663,097  | SALF    | ALL | T | G | 213 | 488 | 253 | 954   | 238 | 508 | 206 | 952   | 1.96E-02 | 0.86 | 0.76 | 0.98 |
|             |    |             |         | SS1 | T | G | 104 | 233 | 124 | 461   | 119 | 251 | 88  | 458   | 1.73E-02 | 0.80 | 0.67 | 0.96 |
|             |    |             |         | SS2 | T | G | 109 | 255 | 129 | 493   | 119 | 257 | 118 | 494   | 3.44E-01 | 0.92 | 0.77 | 1.10 |



|            |    |             |          |     |   |   |     |     |       |       |     |     |       |       |          |      |      |      |
|------------|----|-------------|----------|-----|---|---|-----|-----|-------|-------|-----|-----|-------|-------|----------|------|------|------|
| rs33917740 | 3  | 168,989,631 | SERPIN1  | ALL | G | C | 6   | 175 | 774   | 955   | 4   | 141 | 808   | 953   | 3.17E-02 | 1.28 | 1.02 | 1.60 |
|            |    |             |          | SS1 | G | C | 3   | 92  | 367   | 462   | 1   | 66  | 391   | 458   | 1.72E-02 | 1.48 | 1.07 | 2.05 |
|            |    |             |          | SS2 | G | C | 3   | 83  | 407   | 493   | 3   | 75  | 417   | 495   | 5.03E-01 | 1.11 | 0.81 | 1.53 |
| rs1057564  | 14 | 36,711,410  | SLC25A21 | ALL | C | G | 1   | 92  | 863   | 956   | 1   | 65  | 886   | 952   | 3.17E-02 | 1.42 | 1.03 | 1.95 |
|            |    |             |          | SS1 | C | G | 1   | 40  | 422   | 463   | 1   | 31  | 425   | 457   | 3.16E-01 | 1.27 | 0.80 | 2.02 |
|            |    |             |          | SS2 | C | G | 0   | 52  | 441   | 493   | 0   | 34  | 461   | 495   | 4.51E-02 | 1.57 | 1.01 | 2.43 |
| rs16981869 | 2  | 17,809,724  | FLJ40869 | ALL | G | A | 13  | 185 | 756   | 954   | 9   | 153 | 791   | 953   | 3.20E-02 | 1.26 | 1.02 | 1.56 |
|            |    |             |          | SS1 | G | A | 5   | 89  | 369   | 463   | 4   | 80  | 374   | 458   | 4.41E-01 | 1.13 | 0.83 | 1.52 |
|            |    |             |          | SS2 | G | A | 8   | 96  | 387   | 491   | 5   | 73  | 417   | 495   | 2.46E-02 | 1.41 | 1.04 | 1.90 |
| rs3748993  | 2  | 226,200,014 | KIAA1486 | ALL | A | C | 1   | 84  | 871   | 956   | 3   | 109 | 839   | 951   | 3.26E-02 | 0.73 | 0.55 | 0.98 |
|            |    |             |          | SS1 | A | C | 0   | 34  | 429   | 463   | 1   | 58  | 397   | 456   | 4.67E-03 | 0.54 | 0.35 | 0.83 |
|            |    |             |          | SS2 | A | C | 1   | 50  | 442   | 493   | 2   | 51  | 442   | 495   | 7.82E-01 | 0.95 | 0.64 | 1.40 |
| rs41307479 | 9  | 115,122,468 | WDR31    | ALL | G | C | 78  | 480 | 877   | 1,435 | 56  | 435 | 887   | 1,378 | 3.31E-02 | 1.15 | 1.01 | 1.31 |
|            |    |             |          | SS1 | G | C | 31  | 152 | 279   | 462   | 12  | 152 | 294   | 458   | 3.84E-02 | 1.27 | 1.01 | 1.59 |
|            |    |             |          | SS2 | G | C | 25  | 175 | 292   | 492   | 21  | 146 | 327   | 494   | 3.63E-02 | 1.26 | 1.01 | 1.57 |
| rs15772    | 10 | 15,185,861  | NMT2     | SS3 | G | C | 22  | 153 | 306   | 481   | 23  | 137 | 266   | 426   | 6.01E-01 | 0.94 | 0.75 | 1.18 |
|            |    |             |          | ALL | G | C | 51  | 378 | 525   | 954   | 46  | 332 | 575   | 953   | 3.44E-02 | 1.17 | 1.01 | 1.36 |
|            |    |             |          | SS1 | G | C | 23  | 187 | 252   | 462   | 22  | 155 | 281   | 458   | 7.73E-02 | 1.21 | 0.98 | 1.51 |
| rs62621429 | 12 | 1,781,047   | CACNA2D4 | SS2 | G | C | 28  | 191 | 273   | 492   | 24  | 177 | 294   | 495   | 2.16E-01 | 1.14 | 0.93 | 1.40 |
|            |    |             |          | ALL | T | C | 3   | 61  | 892   | 956   | 0   | 45  | 908   | 953   | 3.55E-02 | 1.51 | 1.03 | 2.21 |
|            |    |             |          | SS1 | T | C | 0   | 29  | 434   | 463   | 0   | 13  | 445   | 458   | 1.38E-02 | 2.25 | 1.16 | 4.35 |
| rs656610   | 6  | 153,259,954 |          | SS2 | T | C | 3   | 32  | 458   | 493   | 0   | 32  | 463   | 495   | 4.55E-01 | 1.20 | 0.74 | 1.94 |
|            |    |             |          | ALL | T | C | 151 | 629 | 655   | 1,435 | 171 | 622 | 582   | 1,375 | 3.56E-02 | 0.89 | 0.80 | 0.99 |
|            |    |             |          | SS1 | T | C | 45  | 202 | 214   | 461   | 59  | 217 | 182   | 458   | 2.67E-02 | 0.80 | 0.66 | 0.98 |
| rs6073969  | 20 | 44,016,243  | ZNF335   | SS2 | T | C | 45  | 209 | 238   | 492   | 60  | 222 | 210   | 492   | 3.86E-02 | 0.82 | 0.68 | 0.99 |
|            |    |             |          | SS3 | T | C | 61  | 218 | 203   | 482   | 52  | 183 | 190   | 425   | 5.01E-01 | 1.07 | 0.88 | 1.30 |
|            |    |             |          | ALL | C | T | 3   | 91  | 860   | 954   | 8   | 111 | 834   | 953   | 3.82E-02 | 0.75 | 0.57 | 0.99 |
| rs458017   | 6  | 111,802,784 | REV3L    | SS1 | C | T | 2   | 31  | 430   | 463   | 5   | 62  | 391   | 458   | 1.81E-04 | 0.46 | 0.30 | 0.70 |
|            |    |             |          | SS2 | C | T | 1   | 60  | 430   | 491   | 3   | 49  | 443   | 495   | 4.76E-01 | 1.15 | 0.79 | 1.67 |
|            |    |             |          | ALL | C | T | 10  | 202 | 1,225 | 1,437 | 5   | 164 | 1,208 | 1,377 | 3.88E-02 | 1.24 | 1.01 | 1.52 |
| rs17703895 | 19 | 6,542,146   | CD70     | SS1 | C | T | 1   | 63  | 399   | 463   | 1   | 41  | 415   | 457   | 3.47E-02 | 1.53 | 1.03 | 2.27 |
|            |    |             |          | SS2 | C | T | 6   | 81  | 405   | 492   | 2   | 61  | 431   | 494   | 1.88E-02 | 1.48 | 1.07 | 2.06 |
|            |    |             |          | SS3 | C | T | 3   | 58  | 421   | 482   | 2   | 62  | 362   | 426   | 3.61E-01 | 0.85 | 0.59 | 1.21 |
| rs940389   | 2  | 48,661,656  | SALF     | ALL | A | C | 125 | 612 | 702   | 1,439 | 102 | 556 | 722   | 1,380 | 4.11E-02 | 1.13 | 1.00 | 1.27 |
|            |    |             |          | SS1 | A | C | 40  | 211 | 214   | 465   | 27  | 184 | 248   | 459   | 1.07E-02 | 1.30 | 1.06 | 1.59 |
|            |    |             |          | SS2 | A | C | 52  | 210 | 231   | 493   | 39  | 200 | 256   | 495   | 6.77E-02 | 1.20 | 0.99 | 1.45 |
| rs574584   | 8  | 26,779,601  | ADRA1A   | SS3 | A | C | 33  | 191 | 257   | 481   | 36  | 172 | 218   | 426   | 3.61E-01 | 0.91 | 0.74 | 1.12 |
|            |    |             |          | ALL | C | G | 92  | 400 | 463   | 955   | 89  | 463 | 401   | 953   | 4.28E-02 | 0.87 | 0.76 | 1.00 |
|            |    |             |          | SS1 | C | G | 46  | 189 | 227   | 462   | 43  | 245 | 170   | 458   | 9.17E-03 | 0.77 | 0.64 | 0.94 |
| rs2278221  | 5  | 178,514,465 | ADAMTS2  | SS2 | C | G | 46  | 211 | 236   | 493   | 46  | 218 | 231   | 495   | 7.79E-01 | 0.97 | 0.80 | 1.18 |
|            |    |             |          | ALL | C | T | 5   | 109 | 1,323 | 1,437 | 3   | 140 | 1,236 | 1,379 | 4.37E-02 | 0.77 | 0.60 | 0.99 |
|            |    |             |          | SS1 | C | T | 1   | 32  | 429   | 462   | 2   | 47  | 409   | 458   | 5.37E-02 | 0.65 | 0.42 | 1.01 |
| rs10493753 | 1  | 84,764,257  | CTBS     | SS2 | C | T | 2   | 37  | 454   | 493   | 1   | 58  | 436   | 495   | 5.49E-02 | 0.67 | 0.45 | 1.01 |
|            |    |             |          | SS3 | C | T | 2   | 40  | 440   | 482   | 0   | 35  | 391   | 426   | 6.34E-01 | 1.12 | 0.71 | 1.76 |
|            |    |             |          | ALL | A | G | 88  | 536 | 807   | 1,431 | 77  | 471 | 830   | 1,378 | 4.68E-02 | 1.13 | 1.00 | 1.28 |
| rs4834268  | 4  | 113,499,417 | ALPK1    | SS1 | A | G | 29  | 173 | 259   | 461   | 23  | 149 | 285   | 457   | 5.91E-02 | 1.23 | 0.99 | 1.53 |
|            |    |             |          | SS2 | A | G | 38  | 200 | 253   | 491   | 32  | 165 | 298   | 495   | 1.14E-02 | 1.30 | 1.06 | 1.59 |
|            |    |             |          | SS3 | A | G | 21  | 163 | 295   | 479   | 22  | 157 | 247   | 426   | 2.64E-01 | 0.88 | 0.71 | 1.10 |
| rs28372855 | 19 | 38,263,929  | GPATCH1  | ALL | C | G | 2   | 52  | 901   | 955   | 0   | 37  | 916   | 953   | 4.70E-02 | 1.53 | 1.00 | 2.32 |
|            |    |             |          | SS1 | C | G | 2   | 24  | 437   | 463   | 0   | 14  | 444   | 458   | 3.16E-02 | 2.01 | 1.05 | 3.84 |
|            |    |             |          | SS2 | C | G | 0   | 28  | 464   | 492   | 0   | 23  | 472   | 495   | 4.65E-01 | 1.23 | 0.70 | 2.15 |
| rs28372855 | 19 | 38,263,929  | GPATCH1  | ALL | G | C | 146 | 465 | 345   | 956   | 170 | 474 | 308   | 952   | 4.72E-02 | 0.88 | 0.77 | 1.00 |
|            |    |             |          | SS1 | G | C | 67  | 228 | 168   | 463   | 82  | 239 | 136   | 457   | 2.96E-02 | 0.81 | 0.68 | 0.98 |
|            |    |             |          | SS2 | G | C | 79  | 237 | 177   | 493   | 88  | 235 | 172   | 495   | 5.11E-01 | 0.94 | 0.79 | 1.13 |
| rs28372855 | 19 | 38,263,929  | GPATCH1  | ALL | C | G | 27  | 285 | 644   | 956   | 12  | 268 | 670   | 950   | 4.85E-02 | 1.19 | 1.00 | 1.41 |
|            |    |             |          | SS1 | C | G | 8   | 132 | 323   | 463   | 5   | 118 | 333   | 456   | 2.43E-01 | 1.17 | 0.90 | 1.51 |
|            |    |             |          | SS2 | C | G | 19  | 153 | 321   | 493   | 7   | 150 | 337   | 494   | 1.09E-01 | 1.21 | 0.96 | 1.52 |

\* adjusted for sample set

Note 1: rs3789604 also had P<0.05 (published in J Invest Dermatol 129: 629-634, 2009)

Note 2: Bonferroni P=0.05 corresponds to uncorrected P=1.98x10<sup>-6</sup>, based on 25,215 markers tested in the initial pooled cases and control.
